# Supplementary material
Source: PubMed Central journal article supplement (PMC7872588)

# Differential roles of extracellular Histidine residues of GPR68 for proton-sensing and allosteric modulation by divalent metal ions

*Xi-Ping Huang\**, Terrence P. Kenakin, Shuo Gu, Brian K. Shoichet, Bryan L. Roth

Department of Pharmacology and the National Institute of Mental Health Psychoactive Drug Screening Program (NIMH PDSP) (XPH, TPK, BLR), Division of Chemical Biology and Medicinal Chemistry, Eshelman School of Pharmacy (BLR), the University of North Carolina at Chapel Hill, Chapel Hill, North Carolina, 27599

Department of Pharmaceutical Science (SG, BKS), University of California, San Francisco, California, 94158

## Table of content

1. Supplementary Table 1. Pharmacological parameters of metal ions and small molecule PAMs (ogerin and lorazepam) at GPR68 WT and mutant receptors. S2
2. Supplementary Figure 1. Metal ion concentration response curves at GPR4, GPR65, and GPR68 under different pH conditions. S8

Supplementary Table 1. Pharmacological parameters of metal ions and small molecule PAMs (ogerin and lorazepam) at GPR68 WT and mutant receptors.

| Ligand           | Receptor | E <sub>max</sub> <sup>a</sup> | pEC <sub>50</sub> | Hill   |
|------------------|----------|-------------------------------|-------------------|--------|
| Cd <sup>2+</sup> | WT       | 2.70 (S)                      | 7.52              | 17.13  |
|                  |          | 0.85 (I)                      | 4.15              | -6.84  |
|                  | H17A     | 1.8 (S)                       | 6.28              | 16.22  |
|                  |          | 0.40 (I)                      | 3.74              | -11.20 |
|                  | H20A     | 1.87 (S)                      | 5.48              | 16.16  |
|                  |          | 0.97 (I)                      | 3.40              | -26.25 |
|                  | H84A     | 1.86 (S)                      | 7.21              | 18.01  |
|                  |          | 0.61 (I)                      | 3.98              | -7.51  |
|                  | H89A     | 1.55 (S)                      | 7.01              | 14.12  |
|                  |          | 0.58 (I)                      | 4.12              | -8.45  |
|                  | H159A    | 1.90 (S)                      | 7.38              | 22.81  |
|                  |          | 0.44 (I)                      | 3.86              | -5.94  |
| H169A            | 0.00 (I) | 3.91                          | -0.68             |        |
|                  |          |                               |                   |        |
| H175A            | 1.90 (S) | 7.43                          | 18.63             |        |
|                  | 0.78 (I) | 4.12                          | 9.62              |        |
| H245A            | 2.55 (S) | 7.57                          | 21.88             |        |
|                  | 0.36 (I) | 4.09                          | -10.00            |        |
| H269A            | 2.48 (S) | 6.97                          | 19.05             |        |
|                  | 0.65 (I) | 3.98                          | -6.90             |        |
| C13A             | 4.32 (S) | 5.78                          | 10.40             |        |
|                  | 0.56 (I) | 3.20                          | -9.16             |        |
| C258A            | 3.76 (S) | 5.94                          | 11.52             |        |
|                  | 0.14 (I) | 3.01                          | -8.13             |        |

|                  |                  |          |          |       |
|------------------|------------------|----------|----------|-------|
|                  | 4HA              | 0.00 (I) | 3.69     | -0.75 |
| Co <sup>2+</sup> | WT               | 3.01 (S) | 7.36     | 1.21  |
|                  | H17A             | 3.02 (S) | 6.09     | 0.75  |
|                  | H20A             | 2.83 (S) | 4.31     | 0.60  |
|                  | H84A             | 2.90 (S) | 4.88     | 0.50  |
|                  | H89A             | 1.65 (S) | 5.77     | 0.48  |
|                  | H159A            | 2.03 (S) | 7.06     | 1.35  |
|                  | H169A            | 1.99 (S) | 4.39     | 0.71  |
|                  | H175A            | 2.50 (S) | 6.93     | 0.82  |
|                  | H245A            | 3.19 (S) | 7.19     | 0.92  |
|                  | H269A            | 2.79 (S) | 6.70     | 0.98  |
|                  | C13A             | 6.60 (S) | 4.99     | 0.59  |
|                  | C258A            | 5.64 (S) | 5.14     | 0.58  |
|                  | 4HA              | 0.00 (I) | 2.57     | -0.82 |
|                  | Cu <sup>2+</sup> | WT       | 1.40 (S) | 7.15  |
|                  |                  | 0.14 (I) | 5.51     | -2.52 |
| H17A             |                  | 0.09 (I) | 5.15     | -4.02 |
| H20A             |                  | 0.04 (I) | 4.83     | -1.41 |
| H84A             |                  | 0.11 (I) | 5.11     | -3.41 |
| H89A             |                  | 0.08 (I) | 4.72     | -1.86 |
| H159A            |                  | 0.07 (I) | 4.67     | -1.92 |
| H169A            |                  | 0.05 (I) | 5.34     | -1.69 |
| H175A            |                  | 0.10 (I) | 4.75     | -2.25 |
| H245A            |                  | 0.18 (I) | 6.04     | -6.08 |
| H269A            |                  | 0.07 (I) | 4.69     | -1.58 |
| C13A             |                  | ND       |          |       |

|                  |                  |           |          |      |
|------------------|------------------|-----------|----------|------|
|                  | C258A            | ND        |          |      |
|                  | 4HA              | ND        |          |      |
| Fe <sup>2+</sup> | WT               | 2.98 (S)  | 5.80     | 0.80 |
|                  | H17A             | 2.24 (S)  | 5.10     | 0.82 |
|                  | H20A             | 1.66 (S)  | 5.37     | 0.28 |
|                  | H84A             | 2.24 (S)  | 4.61     | 0.59 |
|                  | H89A             | 1.50 (S)  | 5.91     | 0.65 |
|                  | H159A            | 2.01 (S)  | 5.53     | 1.04 |
|                  | H169A            | 2.34 (S)  | 2.31     | 0.34 |
|                  | H175A            | 2.26 (S)  | 5.60     | 0.83 |
|                  | H245A            | 2.93 (S)  | 5.57     | 1.04 |
|                  | H269A            | 2.37 (S)  | 5.28     | 0.96 |
|                  | C13A             | 6.15 (S)  | 4.02     | 0.62 |
|                  | C258A            | 5.62 (S)  | 3.87     | 0.58 |
|                  | 4HA              | 1.55 (S)  | 2.99     | 0.56 |
|                  | Mn <sup>2+</sup> | WT        | 6.18 (S) | 3.81 |
| H17A             |                  | 4.61 (S)  | 3.94     | 0.80 |
| H20A             |                  | 3.96 (S)  | 2.80     | 0.56 |
| H84A             |                  | 5.43 (S)  | 3.79     | 0.58 |
| H89A             |                  | 3.16 (S)  | 3.59     | 0.59 |
| H159A            |                  | 4.19 (S)  | 4.02     | 0.46 |
| H169A            |                  | 2.83 (S)  | 3.39     | 0.84 |
| H175A            |                  | 6.16 (S)  | 3.16     | 0.34 |
| H245A            |                  | 8.26 (S)  | 3.60     | 0.48 |
| H269A            |                  | 4.49 (S)  | 4.02     | 0.72 |
| C13A             |                  | 10.09 (S) | 3.22     | 0.79 |

|                  |                  |           |          |        |
|------------------|------------------|-----------|----------|--------|
|                  | C258A            | 8.51 (S)  | 3.32     | 0.82   |
|                  | 4HA              | 1.45 (S)  | 3.78     | 1.07   |
| Ni <sup>2+</sup> | WT               | 2.98 (S)  | 6.55     | 0.51   |
|                  | H17A             | 2.77 (S)  | 5.84     | 0.66   |
|                  | H20A             | 2.13 (S)  | 5.47     | 1.70   |
|                  | H84A             | 2.55 (S)  | 4.47     | 0.48   |
|                  | H89A             | 1.71 (S)  | 5.02     | 0.48   |
|                  | H159A            | 2.83 (S)  | 5.82     | 0.39   |
|                  | H169A            | 1.83 (S)  | 4.95     | 0.87   |
|                  | H175A            | 2.52 (S)  | 5.98     | 0.39   |
|                  | H245A            | 2.77 (S)  | 6.59     | 0.69   |
|                  | H269A            | 2.93 (S)  | 5.89     | 0.41   |
|                  | C13A             | 6.28 (S)  | 5.47     | 0.82   |
|                  | C258A            | 5.22 (S)  | 5.46     | 0.81   |
|                  | 4HA              | 0.22 (I)  | 3.20     | -1.36  |
|                  | Zn <sup>2+</sup> | WT        | 2.44 (S) | 6.98   |
|                  |                  | 0.30 (I)  | 4.47     | 11.08  |
| H17A             |                  | 0.06 (I)  | 4.52     | -1.89  |
| H20A             |                  | 0.10 (I)  | 3.84     | -1.37  |
| H84A             |                  | 1.40 (S)  | 6.79     | 21.29  |
|                  |                  | 0.10 (I)  | 4.63     | -4.63  |
| H89A             |                  | 1.35 (S)  | 6.69     | 21.69  |
|                  |                  | 0.14 (I)  | 4.12     | -10.29 |
| H159A            |                  | 1.75 (S)  | 6.75     | 22.93  |
|                  |                  | 0.01 (I)  | 4.28     | -10.55 |
|                  | H169A            | -0.02 (I) | 5.68     | -1.38  |

|       |           |                      |              |                 |
|-------|-----------|----------------------|--------------|-----------------|
|       | H175A     | 1.60 (S)<br>0.30 (I) | 6.80<br>4.32 | 20.73<br>-10.14 |
|       | H245A     | 2.20 (S)<br>0.14 (I) | 6.91<br>4.70 | 19.83<br>-14.20 |
|       | H269A     | 1.60 (S)<br>0.40 (I) | 6.59<br>4.24 | 16.66<br>-16.20 |
|       | C13A      | 1.71 (S)<br>0.10 (I) | 5.81<br>4.25 | 15.12<br>-16.82 |
|       | C258A     | 1.45 (S)<br>0.13 (I) | 6.14<br>4.28 | 23.41<br>-16.08 |
|       | 4HA       | 0.04 (I)             | 5.05         | -1.00           |
|       | Lorazepam | WT                   | 2.78 (S)     | 5.28            |
| H17A  |           | 2.40 (S)             | 5.79         | 0.80            |
| H20A  |           | 2.53 (S)             | 5.22         | 0.97            |
| H84A  |           | 2.26 (S)             | 5.87         | 0.88            |
| H89A  |           | 1.73 (S)             | 5.78         | 0.70            |
| H159A |           | 1.83 (S)             | 5.51         | 1.23            |
| H169A |           | 2.44 (S)             | 5.40         | 0.59            |
| H175A |           | 2.79 (S)             | 4.86         | 0.56            |
| H245A |           | 1.94 (S)             | 6.03         | 1.48            |
| H269A |           | 2.38 (S)             | 5.66         | 1.16            |
| C13A  |           | 3.35 (S)             | 5.40         | 1.15            |
| C258A |           | 2.93 (S)             | 5.29         | 0.95            |
| 4HA   |           | 3.21 (S)             | 5.34         | 1.20            |
|       |           | WT                   | 2.74 (S)     | 5.52            |
|       | H17A      | 2.21 (S)             | 5.55         | 1.02            |

|        |       |          |      |      |
|--------|-------|----------|------|------|
| Ogerin | H20A  | 2.28 (S) | 5.27 | 1.00 |
|        | H84A  | 2.26 (S) | 5.56 | 1.03 |
|        | H89A  | 1.97 (S) | 5.41 | 0.88 |
|        | H159A | 1.71 (S) | 5.34 | 1.43 |
|        | H169A | 2.16 (S) | 5.36 | 0.78 |
|        | H175A | 1.42 (S) | 5.33 | 1.83 |
|        | H245A | 1.53 (S) | 5.43 | 1.56 |
|        | H269A | 2.38 (S) | 5.54 | 1.31 |
|        | C13A  | 3.17 (S) | 5.40 | 1.13 |
|        | C258A | 2.71 (S) | 5.07 | 0.99 |
|        | 4HA   | 2.30 (S) | 5.06 | 1.28 |

Concentration responses are presented in Figure 7 and Figure 9. Parameters were retrieved from fitted curves in Prism 8.4. <sup>a</sup> (S) for stimulation and (I) for inhibition. ND, not determined.

Supplementary Figure 1. Metal ion concentration responses at GPR68 (right), GPR65 (middle) and GPR4 (left) under different pH conditions – pH 8.40, 8.20, 8.00, and 7.60 at GPR4; pH 8.00, 7.80, 7.40, and 7.00 at GPR65; and pH 7.40, 7.00, 6.80, and 6.40 at GPR68. G<sub>s</sub>-cAMP production was measured in transiently transfected HEK293T cells using the GloSensor cAMP assays. Metal ion stock solutions were made in water and diluted in pH pre-adjusted Ca<sup>2+</sup>/Mg<sup>2+</sup> free HBSS based buffers. Results were normalized (0% at pH 8.40 and 100% at pH 7.60 for GPR4, 0% at pH 8.00 and 100% at pH 7.00 for GPR65, 0% at pH 7.40 and 100% at pH 6.40 for GPR68) and represented means ± SEM from a minimum of 3 independent assays, each in quadruplicate. Curves were analyzed in the Prism 8 using the built-in 4-parameter logistic unction or Bell-shape function. 3D-mesh figures are presented in Figure 3. Pharmacological parameters were listed in the Table 2.





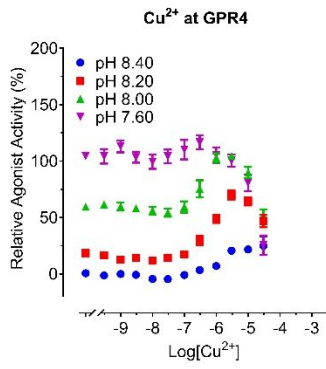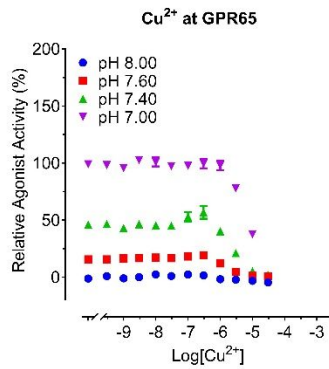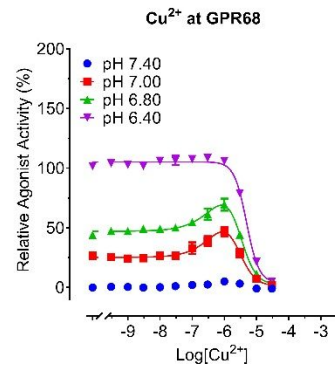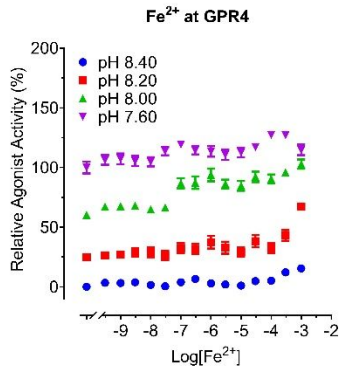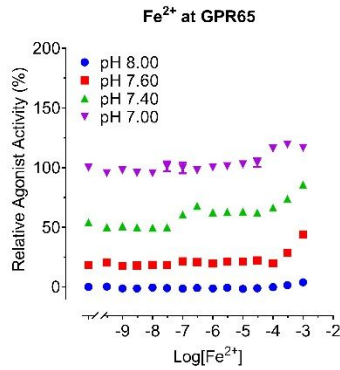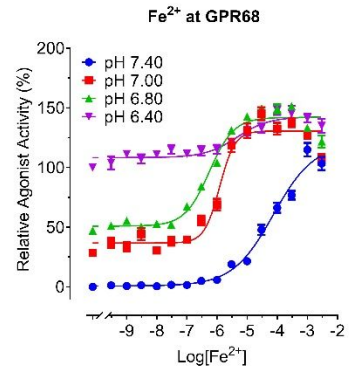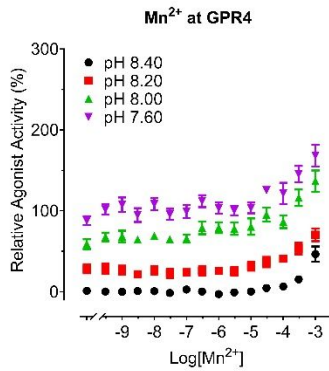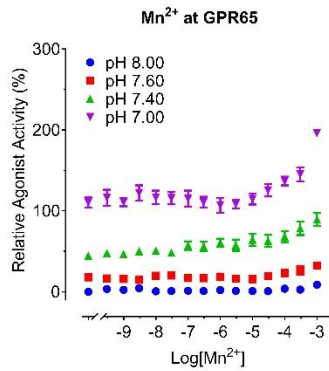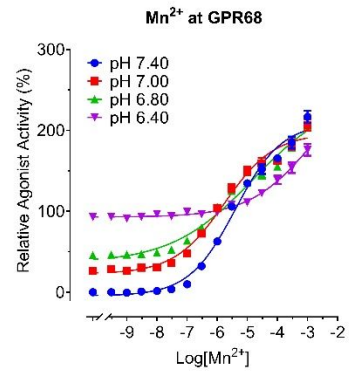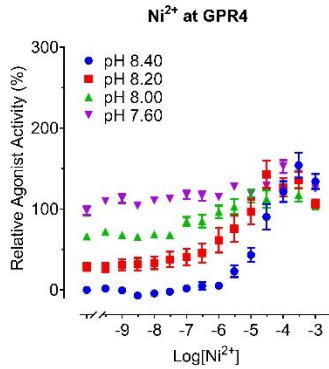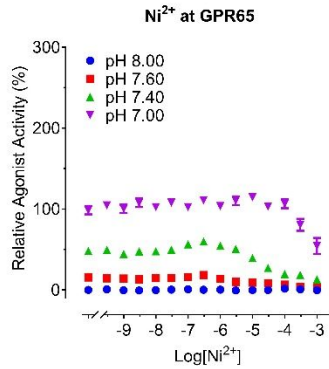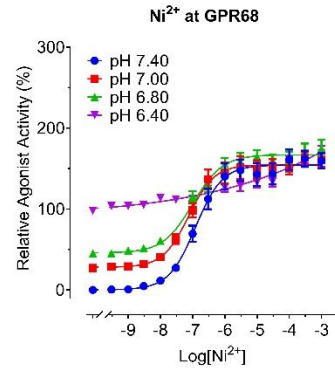

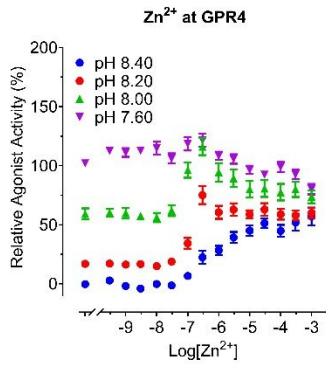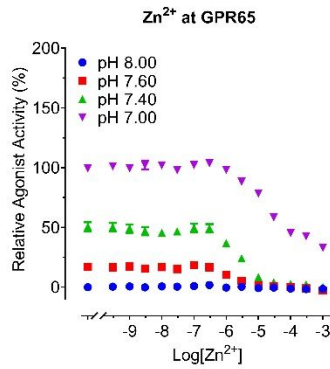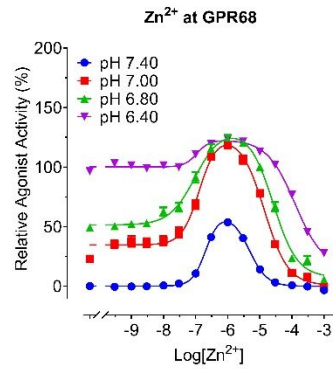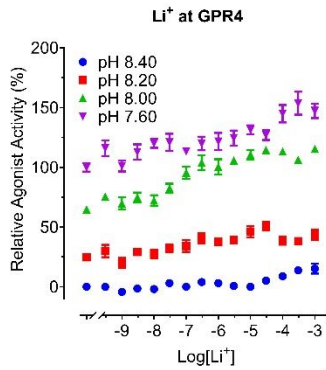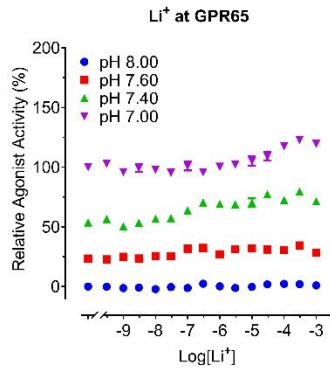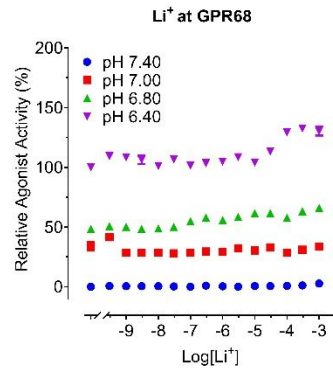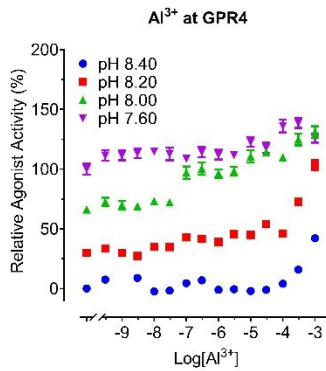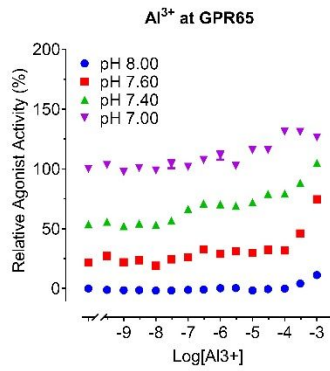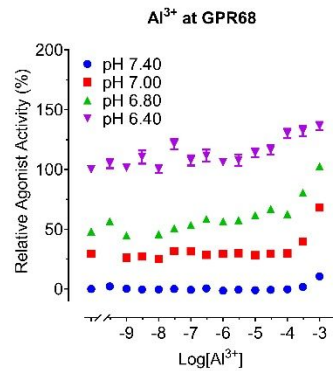

Supplement: NIHMS1664701-supplement-Supplementary_material.pdf [file NIHMS1664701-supplement-Supplementary_material.pdf]
